# Supplementary material
Source: PubMed Central journal article supplement (PMC7018578)
Supplement: NIHMS1065575-supplement-Supp_FigS1.pdf [file NIHMS1065575-supplement-Supp_FigS1.pdf]

## Supplemental Figure

### Deficiency of IgE protects mice from experimental abdominal aortic aneurysms

Jie Li,<sup>\*†</sup> Zhiyong Deng,<sup>†‡</sup> Xian Zhang,<sup>†</sup> Feng Liu,<sup>\*</sup> Chongzhe Yang,<sup>\*†‡</sup> Guo-Ping Shi<sup>†</sup>

<sup>\*</sup>Department of Geriatrics, National Key Clinic Specialty, Guangzhou First People's Hospital, School of Medicine, South China University of Technology, Guangzhou, Guangzhou, China

<sup>‡</sup>Department of Geriatrics, Guangzhou First People's Hospital, Guangzhou Medical University, Guangzhou, China

<sup>†</sup>Department of Medicine, Brigham and Women's Hospital and Harvard Medical School, Boston, MA 02115, USA

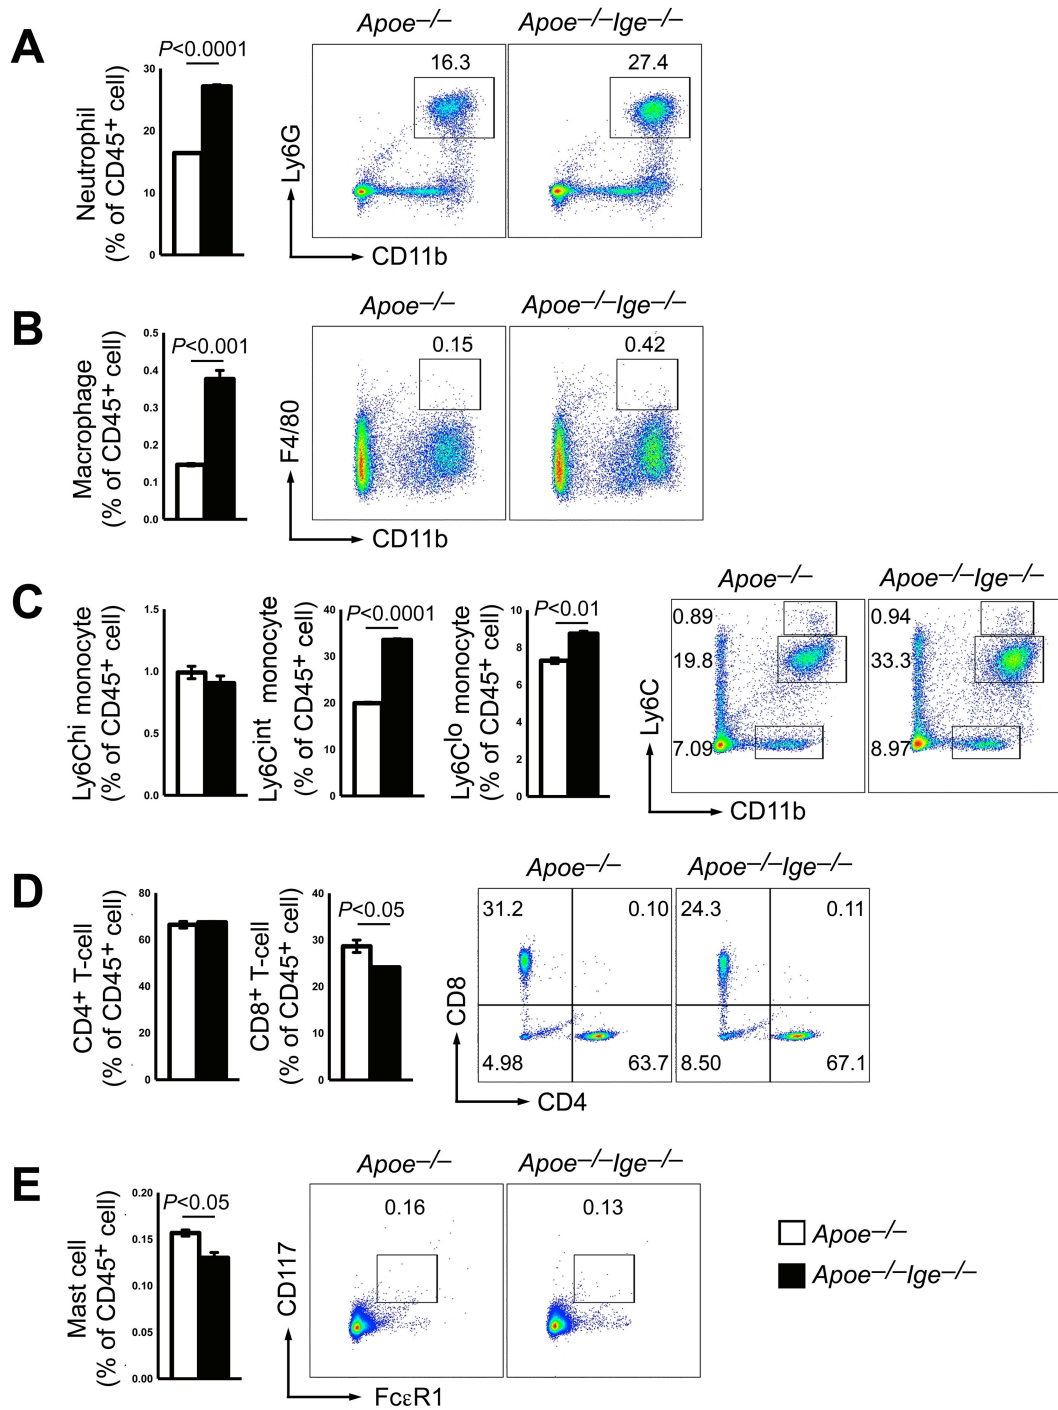

**Figure S1.** FACS analyses of CD11b<sup>+</sup>Ly6G<sup>+</sup> neutrophil (A), CD11b<sup>+</sup>F4/80<sup>+</sup> macrophage (B), CD11b<sup>+</sup>Ly6C<sup>hi</sup>, CD11b<sup>+</sup>Ly6C<sup>int</sup>, and CD11b<sup>+</sup>Ly6C<sup>lo</sup> monocyte (C), CD4<sup>+</sup> and CD8<sup>+</sup> T cells (D), and CD117<sup>+</sup>FcεR1<sup>+</sup> mast cells (E) in spleens from 8 weeks old *Apoe*<sup>-/-</sup> and *Apoe*<sup>-/-</sup>*Ige*<sup>-/-</sup> mice. Data are mean±SEM from three independent experiments.
